# Supplementary material
Source: publisher figshare collection journal article supplement (https://tandf.figshare.com/ndownloader/files/18112385)
Supplement: Supplementary file 1 [file 18112385]

Archive with 2 entries (2 files):
- UASA_A_1469996_Supplement/JASA - An Adapted Loss Function for Censored Quantile Regression.R
- UASA_A_1469996_Supplement/JASA - Supplementary Material - An Adapted Loss Function for Censored Quantile Regression.pdf
